# Supplementary material
Source: PubMed Central journal article supplement (PMC2763037)
Supplement: NIHMS127324-supplement-01.pdf [file NIHMS127324-supplement-01.pdf]

### Supplemental Information

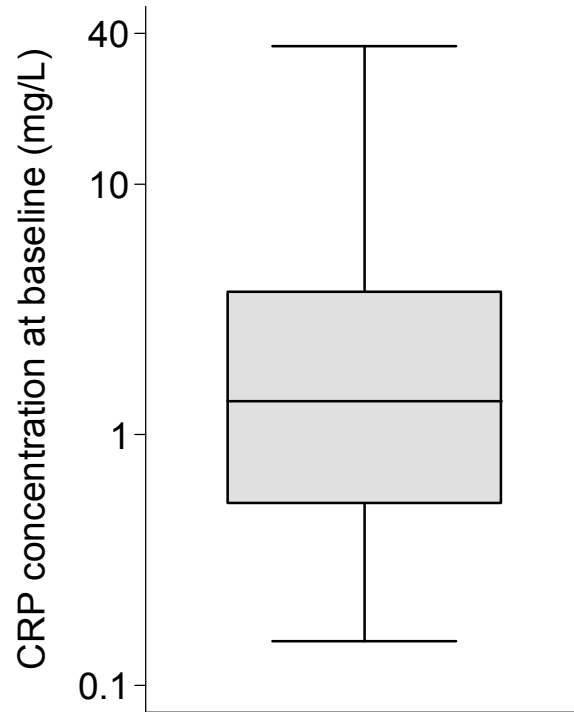

**Figure S1.** Plasma level of C-reactive protein (CRP) in 2983 participants at baseline (2000-2001). Median, first and third quartiles, and range are presented in a box plot. Vertical axis is log-scaled.

**Table S1.** Effect of persistent vs. transient elevation of C-reactive protein (CRP) on fatigue at follow-up (N=2921).

| CRP concentration                     | Adjusted $\beta^*$ | P     | Adjusted $\beta$ for trend* | P for trend |
|---------------------------------------|--------------------|-------|-----------------------------|-------------|
| Low at both examinations              | 0                  |       |                             |             |
| High at baseline and low at follow-up | 0.007              | 0.703 | 0.043                       | 0.032       |
| Low at baseline and high at follow-up | 0.018              | 0.312 |                             |             |
| High at both examinations             | 0.042              | 0.041 |                             |             |

‘Low’ means CRP  $\leq$  3 mg/L; ‘High’ means CRP  $>$  3 mg/L

\* Adjusted for age, sex, ethnicity, education, BMI, systolic blood pressure, regular aspirin use, depressive symptoms, sleep quality, pain, smoking, alcohol consumption, and physical activity
